# Supplementary material
Source: PubMed Central journal article supplement (PMC3756818)
Supplement: NIHMS507330-supplement-01.pdf [file NIHMS507330-supplement-01.pdf]

1 **SUPPLEMENTARY DATA**

- 2
- 3 1. **Figure S1**, Related to Experimental Procedures: Electron Density at the
- 4 Interface of the Dimer Spike
- 5
- 6 2. **Figure S2**, Related to Figure 1: Overlay of apo and +AT-130 Electron
- 7 Densities
- 8
- 9 3. **Figure S3**, Related to Figure 2: The HBV Core Protein Homodimer
- 10
- 11 4. **Figure S4**, Related to Figure 4 and Experimental Procedures: Stereo
- 12 Images of AT-130 Binding Sites, and AT-130 Isomers and *cis*-isomers of
- 13 Related Phenylpropenamide Derivatives
- 14
- 15 5. **Figure S5**, Related to Figure 6: AT-130 in vivo Activity as Compared to
- 16 HAPs
- 17
- 18 6. **Table S1, Related to Table 1:** +HAP1 and +AT-130 Unit Cell Comparison
- 19
- 20 7. **SUPPLEMENTARY EXPERIMENTAL PROCEDURES**
- 21
- 22 8. **Movie S1**, Related to Figure 3: Rigid-body movement of the A/B dimer
- 23
- 24 9. **Movie S2**, Related to Figure 3: Tertiary conformational changes of the C/D
- 25 dimer
- 26
- 27 10. **Movie S3**, Related to Figure 4: Quasi-equivalent binding pockets with AT-
- 28 130
- 29
- 30

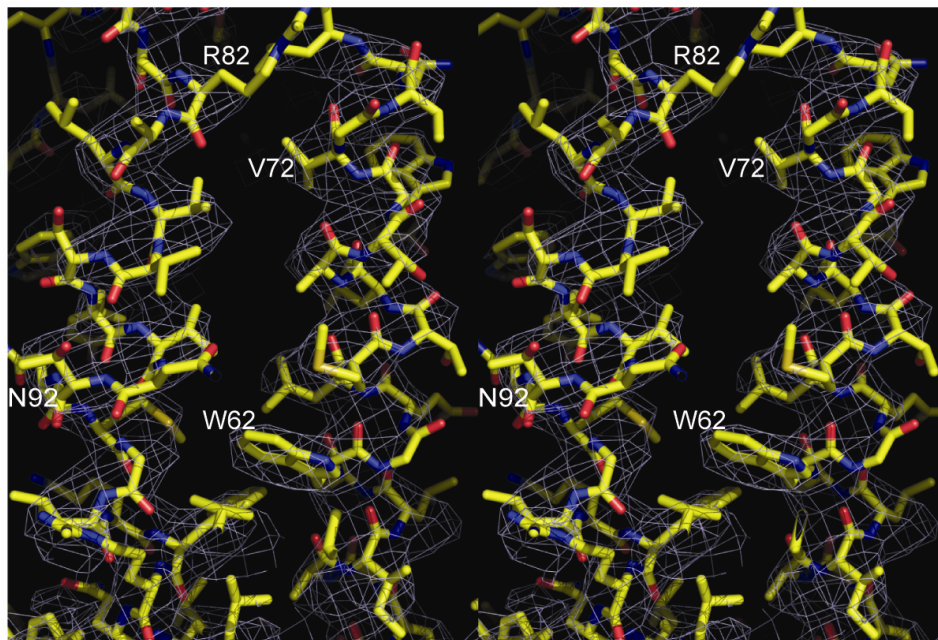

31  
32  
33  
34  
35  
36  
37  
38  
39

**Figure S1, Related to Experimental Procedures: Electron Density at the Interface of the Dimer Spike**

A stereo image of the typical B-sharpened density map (mesh) used for model rebuilding and refinement, shown here at the interface of the A/B dimer, with the refined model rebuilt into the density.

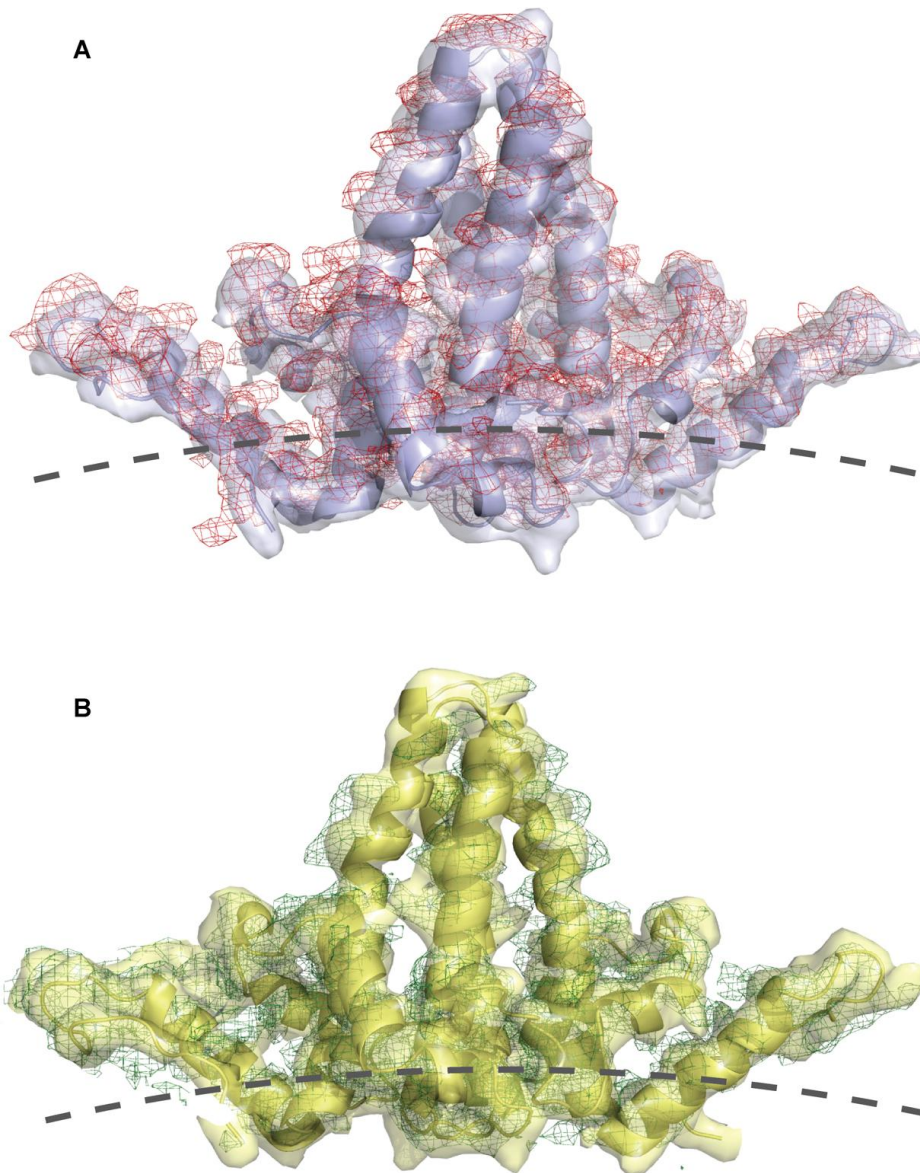

41

42

43 **Figure S2, Related to Figure 1: Overlay of apo and +AT-130 Electron Density**

44 (A) A/B dimer density mismatch. The 1QGT model structure shown as a blue

45 ribbon, and the corresponding density as a blue surface. The +AT-130 2Fo-Fc

46 density is shown as a red mesh (contoured at  $1.5\sigma$ ). The upward shift of the A/B

47 subunit is most notable at the leftmost end of the A-monomer.

48 (B) C/D dimer density mismatch. The 1QGT model structure is shown as a yellow

49 ribbon with corresponding density as a yellow surface. The +AT-130 2Fo-Fc

50 density is the green mesh, showing little quaternary displacement but highlighting

51 the outward bulging of the spike caused by AT-130. The dotted lines correspond

52 to a capsid radius of  $140\text{\AA}$ .

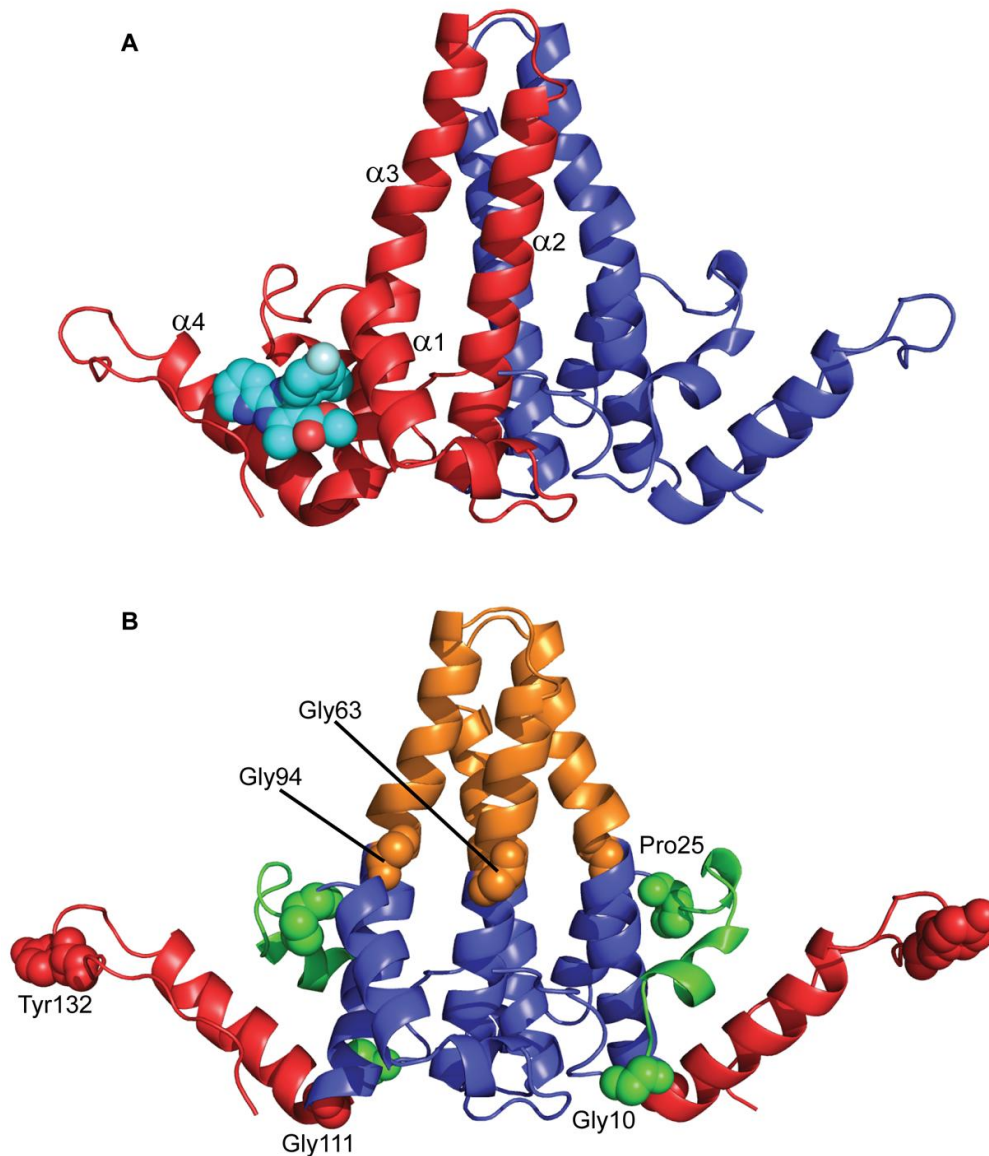

53  
54

55 **Figure S3, Related to Figure 2: The HBV Core Protein Homodimer**

56 (A) The HBV core protein dimer has a largely  $\alpha$ -helical structure. The four main  
57 helices are labeled as in Figure 2. HAP1 (cyan spheres) binds to a hydrophobic  
58 pocket located at the dimer-dimer interface.  
59 (B) The domains of the HBV core protein. The four distinct domains are the  
60 central chassis domain (blue), the fulcrum helix (Gly10-Pro25, green), the spike  
61 tip (Gly63-Gly94, orange), and the contact domain (Gly111 to the C-terminus,  
62 including Y132, red). The glycines and proline (shown as spheres) delineate  
63 these domains and act as hinges, allowing each to move independently  
64 (Packianathan, 2010). In solution, free dimer has a more open configuration and  
65 adopts the more compact structure shown here upon assembly.

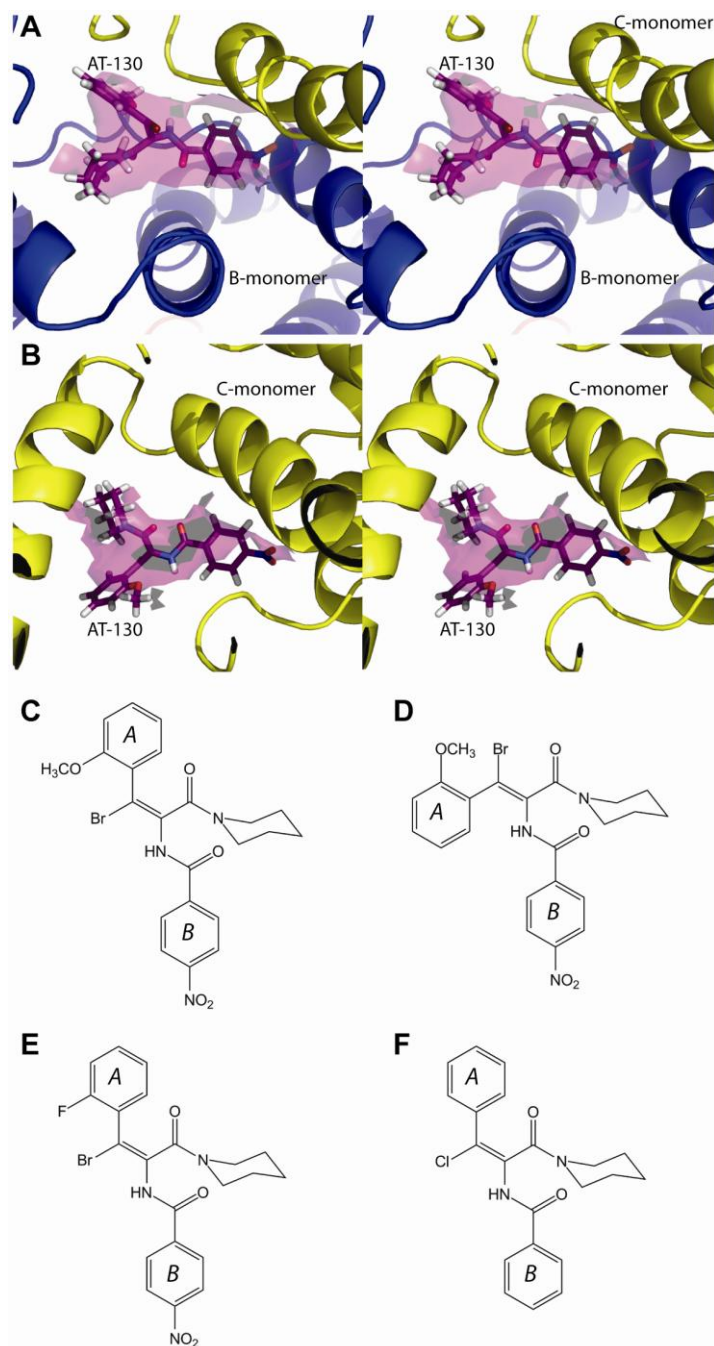

66  
67

68 **Figure S4, Related to Figure 4 and Experimental Procedures: Stereo Images**  
69 **of AT-130 Binding Sites, and AT-130 Isomers and *cis*-isomers of Related**  
70 **Phenylpropenamide Derivatives**

71 (A) The B-pocket, with AT-130 density contoured to  $2\sigma$ . (B) The C-pocket, with  
72 AT-130 density contoured to  $1\sigma$ . (C) The *cis*-isomer of AT-130 around the vinyl  
73 bromide bond. (D) The *trans*-isomer of AT-130 around the vinyl bromide bond. (E)  
74 B-21 (Katen, 2010). (F) AT-61 (King et al., 1998). Density in panels A and B is  
75 sharpened with a B factor of -150.

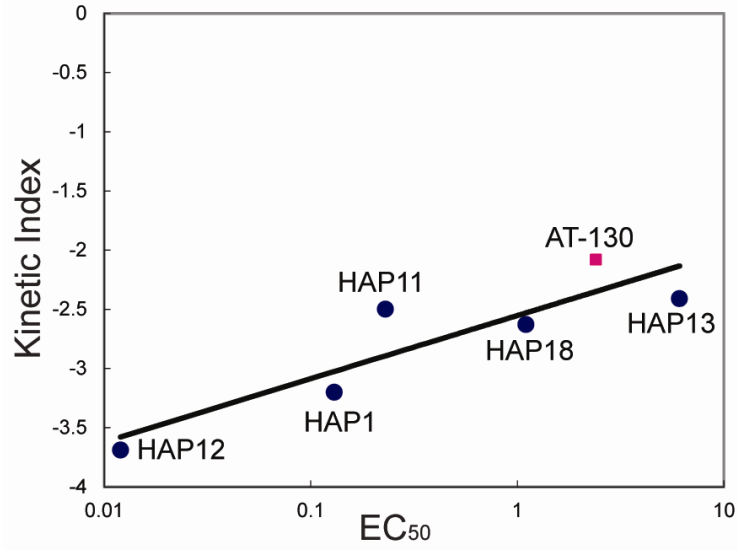

76  
 77  
 78  
 79  
 80  
 81  
 82

**Figure S5, Related to Figure 6: AT-130 in vivo Activity as Compared to HAPs**

AT-130 virus suppression properties correlate with the known HAP assembly effectors on the basis of kinetic effect alone.

83 **Legends for movies**

84

85 **Movie S1, Related to Figure 3: Rigid-body movement of the A/B dimer**

86 The A/B dimer from the apo 1QGT structure is morphed to the +AT-130 structure  
87 to show the upward motion of the dimer as a rigid body.

88

89 **Movie S2, Related to Figure 3: Tertiary conformational changes of the C/D**  
90 **dimer**

91 The C/D dimer from the apo 1QGT structure is morphed to the +AT-130 to show  
92 the tertiary structural changes at the spike tip.

93

94 **Movie S3, Related to Figure 4: Quasi-equivalent binding pockets with AT-**  
95 **130**

96 A display showing the icosahedral asymmetric unit and the unique quasi-  
97 equivalent binding sites. The AT-130-bound structure is shown as a ribbon  
98 diagram, with the electron density map contoured to  $1.5\sigma$  shown as a gray solid.  
99 HAP1 (cyan) exclusively binds in the pocket at the base of the yellow C-monomer.  
100 Density is visible to  $2\sigma$ , into which we were able to model the AT-130 (dark  
101 magenta) molecule. However, much stronger, clearer density is visible above  $3\sigma$   
102 in the blue B-monomer, into which we can clearly fit the *cis*-isomer of AT-130  
103 (light magenta).

104

105 **Table S1, Related to Table 1: +HAP1 and +AT-130 Unit Cell Comparison**

| Unit cell | Apo Cp149<br>(2G33)* | +HAP1<br>(2G34)* | +AT-130<br>(4G93) |
|-----------|----------------------|------------------|-------------------|
| a (Å)     | 558.4                | 528.5            | 527.4             |
| b (Å)     | 327.1                | 366.6            | 362.8             |
| c (Å)     | 562.2                | 540.1            | 538.2             |
| $\beta$   | 109.1°               | 104.8°           | 105.1°            |

106

107 \*from reference (Bourne et al., 2006)

108



109 **SUPPLEMENTARY EXPERIMENTAL PROCEDURES**

110

111 **Sample Preparation** Cp149 core protein (or capsid protein) dimer from Hepatitis B  
112 subtype *adyw* was expressed in *E. coli* from a pET11-based plasmid, pCp149. Cells  
113 were suspended in lysis buffer containing 50 mM Tris-HCl, pH 7.5, 100 mM NaCl, 5 mM  
114 DTT, 0.01 mg/mL DNase, 0.1 mg/mL RNase and cOmplete Protease Inhibitor Cocktail  
115 Tablets (Roche). Cells were lysed by sonication and centrifuged at 250,000xg for 30  
116 minutes to remove cell debris. Solid  $(\text{NH}_4)_2\text{SO}_4$  was slowly added to the supernatant to a  
117 final concentration of 20% saturation. The solution was stirred for 1 h on ice, after which it  
118 was centrifuged at 25000xg for 1 h. The pellet was resuspended in ~50-60 mL of 100 mM  
119 Tris-HCl, pH 7.5, 100 mM NaCl, and 2 mM DTT (Buffer A) and loaded on a Sepharose  
120 CL-4B (GE Health Sciences) column equilibrated with column buffer A. HBV capsids  
121 were well separated from larger complexes and aggregates (which eluted in the void  
122 volume) and from soluble proteins of lower molecular weight. Fractions were then pooled  
123 on the basis of the chromatographic profile and SDS-PAGE, and then concentrated by  
124 ultrafiltration using a YM 100 ultrafiltration membrane (Amicon) to about 2.0 mg/mL.  
125 Concentrated protein was dialyzed against 50 mM sodium bicarbonate, pH 9.5, 1 mM  
126 DTT (Buffer N). Solid urea was added to 3.0 M and incubated on ice for 1.5 h. The now  
127 dissociated capsids were loaded onto a Sephacryl S-300 column (GE Health Sciences)  
128 equilibrated with Buffer N. Eluted fractions containing dimeric protein were pooled on the  
129 basis of SDS-PAGE analysis and concentrated by ultrafiltration using a YM 10  
130 ultrafiltration membrane (Amicon) to about 2.0 mg/mL. Disassembled dimer was then  
131 dialyzed into 50mM Hepes, pH 7.5, and reassembled into capsids by the addition of NaCl  
132 to a final concentration of 0.5 M NaCl and incubated at room temperature for 2 h.  
133 Assembled capsids were purified from unassembled dimer and remaining small  
134 molecular weight contaminants by elution on a Sephacryl S-300 column equilibrated with  
135 Buffer N. Fractions containing purified capsids were again pooled on the basis of SDS-

136 PAGE analysis and concentrated by ultrafiltration using a YM 100 ultrafiltration  
137 membrane (Amicon) to about 2.0 mg/mL. The concentrated capsids were then again  
138 dissociated by dialysis against Buffer N, the addition of solid urea to 3.0 M, and  
139 incubation on ice for 1.5 h. The dissociated capsids were loaded onto a Sephacryl S-300  
140 column equilibrated with Buffer N. Eluted fractions containing the purified, active dimeric  
141 capsid protein were pooled on the basis of SDS-PAGE analysis and concentrated by  
142 ultrafiltration using a YM 10 ultrafiltration membrane (Amicon) to about 2.0 mg/mL.  
143 Samples were passed through a 0.2  $\mu\text{m}$  filter and stored at  $-80^{\circ}\text{C}$ . Protein concentration  
144 was quantified by absorbance at 280 nm using an extinction coefficient of  $60,900 \text{ M}^{-1}\text{cm}^{-1}$   
145 (Zlotnick et al., 2002; Zlotnick, 1996). The V124W mutant was expressed and purified  
146 using a similar protocol, with the exception that reassembly was carried out at 50 mM  
147 NaCl and protein concentration was quantified with an extinction coefficient of  $70,025 \text{ M}^{-1}\text{cm}^{-1}$   
148 (Tan et al., 2013). Frozen aliquots of capsid protein were dialyzed against  
149 assembly buffer (50 mM HEPES, pH 7.5) prior to use in light scattering experiments.

150 For crystallization, a modified construct of wild-type Cp149 (3CA-Cp150) was  
151 used, wherein three native cysteine residues were mutated to alanine and an additional  
152 cysteine was appended at position 150; these mutations cause no structural changes  
153 compared to the native structure, improve the diffraction of resultant crystals, and  
154 stabilize capsids via inter-subunit disulfide crosslinking (Bourne et al., 2006). For  
155 crystallization, HBV capsids were expressed described above. Cells were lysed and  
156 RNA-filled capsids were precipitated and purified through the CL-4B size-exclusion step  
157 as described above. After CL-4B fractionation, RNA-filled capsids were pooled and T=4  
158 3CA-Cp150 capsids were purified from free dimer and T=3 particles by sucrose gradient  
159 sedimentation. Sucrose solutions were mixed in 100 mM Tris-HCl, 100 mM NaCl;  
160 continuous 10-40% gradients were generated in SW28 tubes by tiled rotation using a  
161 Gradient Master (Biocomp). One mL capsid aliquots were layered on top of gradients

162 and centrifuged in an SW28 swinging-bucket rotor (Beckman-Coulter) at for 4 hours at  
163 28,000 RPM at 19°C. Bands were visualized by illumination and harvested via side  
164 puncture. Capsids were immediately dialyzed for crystallization into 5 mM Tris-HCl, pH  
165 7.5, 150 mM NaCl. Dialyzed samples were first concentrated in a pressure concentrator  
166 (Amicon) to ~ 1 mg/mL, and then further concentrated to ~ 20 mg/mL in a spin  
167 concentrator (Vivaspin) (Bourne et al., 2006; Zlotnick, 1996; Zlotnick et al., 1999).

168 The phenylpropenamide compound (*E*)-*N*-(1-bromo-1-(2-methoxyphenyl)-3-oxo-3-  
169 (piperidin-1-yl) prop-1-en-2-yl)-4-nitrobenzamide (**AT-130**) was synthesized first from the  
170 generation of (*Z*)-4-(2-methoxybenzylidene)-2-(4-nitrophenyl) oxazol-5(4*H*)-one (**2a**). 4-  
171 Nitrohippuric acid (**1**, 0.5 g, 2.23 mmol) and *o*-anisaldehyde (0.276 g, 2.23 mmol), sodium  
172 acetate (0.183 g, 2.23 mmol) and acetic anhydride (0.6 mL) were combined and heated  
173 until the mixture just began to boil. It was transferred to an oil bath and heated just below  
174 the boiling point for 1 hour. Hot ethanol (2 mL) was added and the mixture was stirred  
175 until homogeneous and then cooled to room temperature. The resulting solid was  
176 collected by suction filtration and washed with a minimum quantity first of cold ethanol  
177 and then with boiling water (approx. 1 mL), and dried *in vacuo* to give **2a** (0.340 g, 68%).  
178 To a solution of oxazolone **2a** (0.5 g, 1.54 mmol) in chloroform at 0 °C, a solution of  
179 piperidine (0.129 g, 1.54 mmol) in chloroform (1 mL) was added dropwise. The yellow  
180 solution was stirred at 0 °C for 1 hour. Solid calcium carbonate (0.154 g, 1.54 mmol) was  
181 added, followed by dropwise addition of bromine (0.246 g, 1.54 mmol) in chloroform (2  
182 mL). The resulting suspension was filtered to remove calcium salts, and the resulting  
183 solution was evaporated to dryness. The resulting orange oil was recrystallized from  
184 ethanol/water (4:1) to give compound **AT-130** (0.312 g, 67%) as a colorless powder  
185 (Katen, 2010).

186

187 **Light Scattering** Observation of kinetics by 90° light scattering was observed with a  
188 Photon Technology International fluorometer set to 400 nm for both excitation and  
189 emission (AT-130 absorbs significant amounts of light at 320nm) (Katen, 2010). Light  
190 scattering was measured for 10 μM (final concentration) wild-type Cp149 reduced with  
191 5% β-mercaptoethanol; assembly was induced by addition of NaCl to a final  
192 concentration of 150 mM NaCl, with and without the addition of 20 μM AT-130.  
193 Reactions were performed using a black masked microcuvette with a 0.3 cm pathlength  
194 (Hellma) and incubated at 23°C. The V124W assembly experiment followed the same  
195 procedure, with the exception that assembly was initiated with 50 mM NaCl due to the  
196 mutant assembly hyperactivity (data not shown). Light scattering is reported in arbitrary  
197 units. All experiments were repeated three or four times and the results averaged.

198

199 **Electron Microscopy** Samples from light scattering experiments were adsorbed to  
200 glow-discharged carbon over paralodian copper grids (EM sciences). Samples were  
201 stained with 2% uranyl acetate and visualized with a JEOL 1010 transmission electron  
202 microscope equipped with a 4Kx4K Gatan CCD camera.

203

204 **Crystallization** Crystallization was optimized from previously determined conditions for  
205 the *adyw* 3CA-Cp150 capsid in complex with the HAP compounds (Bourne et al., 2006).  
206 Co-crystals were grown with the addition of half-molar, equimolar, and twofold excess  
207 molar concentrations of AT-130 in DMSO (relative to the solution concentration of Cp in  
208 capsid form), followed by a 30min room temperature incubation prior to crystallization  
209 setup. Crystallization was carried out at room temperature with 4 μL sitting drops,  
210 initiated by a 1:1 mixture of protein solution with well solution. Protein solutions contained  
211 10 mg/mL 3CA Cp150 capsid in 5 mM Tris buffer, pH 7.5, 150 mM NaCl, and 0.7-3%  
212 DMSO. Well solutions were composed of 5-10% polyethylene glycol 5000

213 monomethylether, 0-5% polyethylene glycol 8000 monomethylether, 6-28% 2,3-  
214 butanediol, 100 mM Tris pH 9.0, 150 mM NaCl, and 300 mM KCl. Crystallization of drug-  
215 free capsids is very slow, on the order of months. AT-130 increased nucleation and  
216 crystals typically appeared after 2-5 days, although diffraction-quality crystals were  
217 relatively rare.

218

219 **Diffraction Data Collection** Crystals were cryoprotected by gradually increasing the drop  
220 concentration of 2,3-butanediol to 20%. Cryoprotectant solutions maintained all other  
221 solution conditions, and contained 2 mg/ml uncrystallized capsid protein as a stabilizing  
222 agent, proven effective for cryoprotection of HAP1 co-crystals (Bourne et al., 2006).  
223 Crystals were flash-frozen in a stream of gaseous -170°C nitrogen. All crystals were  
224 screened in-house before transport to the Advanced Photon Source Beamlines 14BMC  
225 for data collection. The final dataset was collected from a single cryo-cooled crystal  
226 containing a 2:1 molar ratio of AT-130 to Cp dimer; crystallographic statistics are shown  
227 in Table 1.

228

229 **Structure Solution and Refinement** Molecular replacement and averaging was used  
230 for phasing. The native *adv*-like capsid 1QGT was used as the phasing model (Wynne  
231 et al., 1999). Molecular replacement was carried out with the Phaser program in the  
232 CCP4 program suite (McCoy, 2007). Phases calculated to 7 Å were subjected to 60-fold  
233 noncrystallographic symmetry (NCS) averaging and stepwise phase extension; phases  
234 were extended to 4.2 Å with 60-fold NCS averaging. Phases were extended by NCS  
235 averaging in one-lattice-step intervals with AVE by using masks calculated with MAMA,  
236 both from the RAVE suite (Kleywegt et al., 2001). NCS averaging produced an averaging  
237 R factor of 26.0% with a corresponding correlation coefficient of 93.7%. Output maps  
238 were calculated with SigmaA weighting in CCP4 (Collaborative Computational Project,

239 1994). B-sharpened maps were calculated using Fobs scaled by a negative Wilson B  
240 factor of -150. For the Fobs - Fcalc map, Fcalc included bulk solvent scaling, and one  
241 cycle of 60-fold NCS averaging was applied to the resulting map.

242 Refinement was carried out with CNS (Brunger et al., 1998) using strict  
243 icosahedral NCS, isotropic B-factor correction, and bulk solvent scaling. The E-monomer  
244 of the 2.25 Å *adyw* free dimer structure 3KXS was expanded into a complete asymmetric  
245 unit and used as the initial model. Necessary topology files for positional refinement of  
246 AT-130 were generated using the structural parameters of the Z-isomer of AT-61 (Figure  
247 S4F) (Wang, 2011). Bulk solvent scaling was adjusted by creating a protein mask of a  
248 defined radius. Refinement was carried out through positional refinement in conjunction  
249 with torsion molecular dynamics, with slow-cooling from 2,000 K in 50 K steps. Further  
250 positional refinement was iterated with 60-fold NCS averaging and manual rebuilding in  
251 Coot (Emsley, 2010). Three cycles of refinement were carried out, first using the  
252 averaged map as output by AVE, then re-refined using the B-sharpened map in order to  
253 favor geometrical constraints, and then a final round of refinement using the original  
254 averaged data (Supplementary Figure S6). For the final round, the geometry weighting  
255 factor (wa) was explicitly defined to favor geometric restraints given the low resolution. A  
256 test set of 5,000 reflections was flagged in thin shells and used for cross-validation, but  
257 the resulting R free was virtually unchanged from the crystallographic R factor due to  
258 NCS correlation of the test set with the refined data. The molecular model was refined to  
259 yield a crystallographic R factor of 37% (Table 1). This R factor values is consistent with  
260 those of other structures solved to comparable resolutions, such as the HK97  
261 bacteriophage capsid which was solved to 3.45 Å with an R factor of 37.4% (Helgstrand  
262 et al., 2003), or the feline calicivirus capsid, which was solved to 3.4 Å with an R factor of  
263 37.0% (Ossiboff, 2010).

264 Superpositions of models were carried out in Coot (Emsley, 2010), and generation  
265 of an apo map for Fcalc was done with Sfall from the CCP4 package using the 1QGT  
266 model in the appropriate unit cell and orientation from the Phaser solution (Collaborative  
267 Computational Project, 1994). Figures were generated from PyMol (DeLano, 2009) and  
268 Chimera (Pettersen EF, 2004).

269

270 **REFERENCES**

271

- 272 Bourne, C., Finn, M.G., and Zlotnick, A. (2006). Global structural changes in hepatitis B  
273 capsids induced by the assembly effector HAP1. *J Virol* 80, 11055-11061.
- 274 Brunger, A.T., Adams, P.D., Clore, G.M., DeLano, W.L., Gros, P., Grosse-Kunstleve,  
275 R.W., Jiang, J.S., Kuszewski, J., Nilges, M., Pannu, N.S., *et al.* (1998). Crystallography &  
276 NMR system: A new software suite for macromolecular structure determination. *Acta*  
277 *Crystallogr D Biol Crystallogr* 54 ( Pt 5), 905-921.
- 278 Collaborative Computational Project, N. (1994). The CCP4 Suite: Programs for Protein  
279 Crystallography. *Acta Cryst D* 50, 760-763.
- 280 DeLano, W.L. (2009). The PyMOL molecular graphics system, version 1.21r1. Delano  
281 Scientific, San Carlos, CA.
- 282 Emsley, P., B. Lohkamp, W.G. Scott, and K. Cowtan (2010). Features and Development  
283 of Coot. *Acta Cryst* 66, 486-501.
- 284 Helgstrand, C., Wikoff, W.R., Duda, R.L., Hendrix, R.W., Johnson, J.E., and Liljas, L.  
285 (2003). The Refined Structure of a Protein Catenane: The HK97 Bacteriophage Capsid at  
286 3.44 Å Resolution. *J Mol Biol* 334, 885-899.
- 287 Katen, S.P., S.R. Chirapu, M.G. Finn, and A. Zlotnick (2010). Trapping of Hepatitis B  
288 Virus Capsid Assembly Intermediates by Phenylpropenamide Assembly Accelerators.  
289 *Chem Biol* 5, 1125-1136.
- 290 King, R.W., Ladner, S.K., Miller, T.J., Zaifert, K., Perni, R.B., Conway, S.C., and Otto,  
291 M.J. (1998). Inhibition of human hepatitis B virus replication by AT-61, a  
292 phenylpropenamide derivative, alone and in combination with (-)-beta-L-2',3'-dideoxy-3'-  
293 thiacytidine. *Antimicrob Agents Chemother* 42, 3179-3186.
- 294 Kleywegt, G.J., Zou, J.Y., Kjeldgaard, M., and Jones, T.A. (2001). Around O. In  
295 *International Tables for Crystallography*, pp. 353-356, 366-367.
- 296 McCoy, A.J., R.W. Grosse-Kunstleve, P.D. Adams, M.D. Winn, L.C. Storoni, and R.J.  
297 Read (2007). Phaser Crystallographic Software. *J Appl Crystallogr* 40, 658-674.
- 298 Ossiboff, R.J., Y. Zhou, P.J. Lightfoot, B.V. Prasad, J.S. Parker (2010). Conformational  
299 changes in the capsid of a calicivirus upon interaction with its functional receptor. *J Virol*  
300 84, 5550-5564.
- 301 Pettersen EF, G.T., Huang CC, Couch GS, Greenblatt DM, Meng EC, Ferrin TE. (2004).  
302 UCSF Chimera--a visualization system for exploratory research and analysis. *J Comput*  
303 *Chem* 25, 1605-1612.
- 304 Tan, Z., Maguire, M.L., Loeb, D.D., and Zlotnick, A. (2013). Genetically altering the  
305 thermodynamics and kinetics of hepatitis B virus capsid assembly has profound effects on  
306 virus replication in cell culture. *Journal of Virology* 87, 3208-3216.
- 307 Wang, P., Devan Nadhthambi, Ralph T. Mosley, Congrong Niu, Phillip A. Furman,  
308 Michael J. Otto, and Michael J. Sofia (2011). Phenylpropenamide derivatives: Anti-  
309 hepatitis B virus activity of the Z-isomer, SAR and the search for novel analogs. *Bioorg*  
310 *Med Chem Lett* 21, 4642-4647.
- 311 Wynne, S.A., Crowther, R.A., and Leslie, A.G. (1999). The crystal structure of the human  
312 hepatitis B virus capsid. *Mol Cell* 3, 771-780.
- 313 Zlotnick, A., Ceres, P., Singh, S., and Johnson, J.M. (2002). A small molecule inhibits and  
314 misdirects assembly of hepatitis B virus capsids. *J Virol* 76, 4848-4854.



315 Zlotnick, A., Cheng, N., Conway, J.F., Booy, F.P., Steven, A.C., Stahl, S.J., and  
316 Wingfield, P.T. (1996). Dimorphism of Hepatitis B Virus Capsids Is Strongly Influenced  
317 by the C-Terminus of the Capsid Protein. *Biochemistry* 35, 7412-7421.  
318 Zlotnick, A., Palmer, I., Stahl, S.J., Steven, A.C., and Wingfield, P.T. (1999). Separation  
319 and Crystallization of T=3 and T=4 Icosahedral Complexes of the Hepatitis B Virus Core  
320 Protein. *Acta Cryst D* 55, 717-720.  
321  
322
